# Supplementary material
Source: ML conference proceedings conference paper supplement (https://openaccess.thecvf.com/content/CVPR2025/html/Liu_CityWalker_Learning_Embodied_CVPR_2025_paper.html)
Supplement: Supplementary file 1 [file Liu_CityWalker_Learning_Embodied_CVPR_2025_supplemental.pdf]

## Appendix

### A. Details on Data, Model, and Training

**City Walking Videos.** We source our training video data mainly from the city walking<sup>1</sup> and driving<sup>2</sup> playlists on YouTube. The full sourced videos have a total length of 2522 hours. We use 2000 hours of them for training. These videos cover different weather and lighting conditions. Figure I shows a detailed distribution of each condition.

The lower part of Fig. I illustrates the proportion of each critical scenario in our offline expert data based on our definitions. We observe that the union of critical scenarios accounts for less than half of the dataset. However, these scenarios contribute most to the success rate in real-world experiments. This highlights the need for future work to enhance model performance in these critical areas.

**Hyperparameters for Model and Training.** For model and training hyperparameters, we largely follow previous work [1] and adapt some parameters to our case, as shown in Tab. II. Note that DINOv2 [2] uses ViT [3] so it can adapt to any input resolution as long as it is divisible by the patch size. Therefore, we center-crop the  $360 \times 640$  city walking videos to  $350 \times 630$ , and the  $400 \times 400$  teleoperation video to  $392 \times 392$  to keep the aspect ratio and as much visual content as possible.

### B. More Quantitative Results

**Full Ablation Study.** In Tab. I, we provide an extended ablation study, including all the critical scenarios. We can observe that the addition of orientation loss and feature hallucination loss does not result in significant performance improvements. This lack of noticeable enhancement can be attributed to several factors, including the limited size of our training data (1000 hours) and the constrained nature of our test dataset, which is prone to substantial noise in the evaluation results. Consequently, we consider errors beyond the decimal point to be negligible.

Another interesting observation is the decline in performance within the Turn scenario following fine-tuning. We attribute this performance drop to the disproportionate representation of Turn scenarios in our fine-tuning data (8%) compared to the original video data (32%), leading to insufficient training examples for effectively handling turns.

**VLM Performance.** In Tab. III, we present the performance of the VLM (GPT-4o [4]) on our urban navigation tasks. Our results indicate that GPT-4o struggles to generate reasonable navigation actions off-the-shelf via prompting. However, it performs reasonably in predicting the arrival status, likely because this sub-task is inherently more straightforward given the input of past and target locations.

<sup>1</sup>[https://www.youtube.com/@WALKS\\_and\\_the\\_CITY/playlists](https://www.youtube.com/@WALKS_and_the_CITY/playlists)

<sup>2</sup><https://www.youtube.com/@j Utah/playlists>

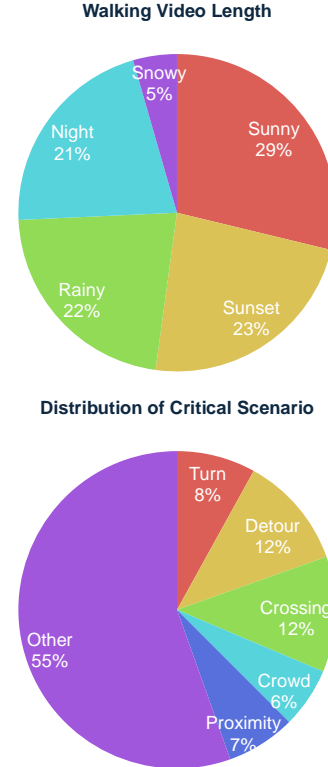

Figure I. **Data distribution.** *Top:* The distribution of different weather and lightning conditions in our video training data. *Bottom:* The distribution of different critical scenarios in our collected data.

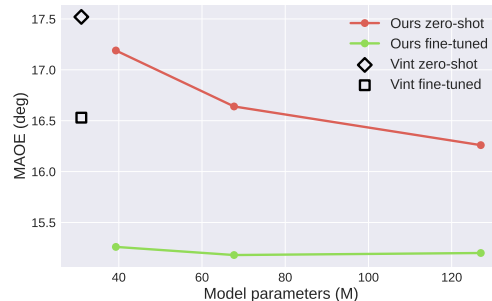

Figure II. **Performance and Model Size.** We show model performance with respect to the size of the model, measured by the number of parameters in the model.

**Impact of Model Size.** We also run experiments to discover the impact of model size on navigation performance. This is done by modifying the number of layers in the transformer model. From Fig. II, we can observe the clear trend that a larger model with more parameters leads to better performance, especially in the zero-shot case. Note that all models in the figure are trained with 2000 hours of video data and we can see a trend of saturation with even larger models. This aligns with the scaling law observed in previous

Table I. **Full Ablation Study**. Here we provide a extended ablation study in supplementary ???. The result is evaluated for all scenarios.

| Training Components |               |             | Mean         | Turn         | Crossing     | Detour       | Proximity    | Crowd        | Other        | All          |
|---------------------|---------------|-------------|--------------|--------------|--------------|--------------|--------------|--------------|--------------|--------------|
| Ori. Loss           | Feature Hall. | Fine-tuning |              |              |              |              |              |              |              |              |
|                     |               |             | 17.03        | <b>27.09</b> | 16.25        | 16.72        | 16.99        | 13.28        | 11.88        | 13.16        |
| ✓                   |               |             | 17.00        | <u>27.14</u> | 16.40        | 16.43        | 16.74        | 13.19        | 12.12        | 13.32        |
| ✓                   | ✓             |             | 17.02        | 27.17        | 15.92        | 16.51        | 17.19        | 13.23        | 12.10        | 13.32        |
|                     |               | ✓           | 15.23        | 28.94        | <b>13.90</b> | <u>13.14</u> | <u>14.39</u> | <b>11.19</b> | <b>9.91</b>  | <b>11.12</b> |
| ✓                   |               | ✓           | <u>15.21</u> | 28.69        | <u>14.05</u> | <b>13.12</b> | <b>14.17</b> | <b>11.19</b> | <u>10.01</u> | <u>11.18</u> |
| ✓                   | ✓             | ✓           | <b>15.16</b> | 27.36        | <u>14.05</u> | 13.20        | 14.44        | <u>11.59</u> | 10.31        | 11.41        |

Table II. Hyperparameters for training the CityWalker model.

| Hyperparameter                     | Value              |
|------------------------------------|--------------------|
| <b>CityWalker Model</b>            |                    |
| Total # Parameters                 | 214M               |
| Trainable # Parameters             | 127M               |
| Image Encoder                      | DINOv2 [2]         |
| Backbone Arch.                     | ViT-B/14           |
| City Walking Input Res.            | 350 × 630          |
| Teleop Input Resolution            | 392 × 392          |
| Token Dimension                    | 768                |
| Attn. Hidden Dim.                  | 768                |
| # Attention Layers                 | 16                 |
| # Attention Heads                  | 8                  |
| Input Context                      | 5                  |
| Prediction Horizon                 | 5                  |
| Input Cord. Repr.                  | Polar Cord.        |
| Fourier Feat. Freq                 | 6                  |
| <b>Training</b>                    |                    |
| # Epochs                           | 10                 |
| Batch Size                         | 32                 |
| Learning Rate                      | $2 \times 10^{-4}$ |
| Optimizer                          | AdamW [5]          |
| LR Schedule                        | Cosine             |
| Compute Resources                  | 2 × H100           |
| Training Walltime                  | 30 hours           |
| Fine-tuning LR                     | $5 \times 10^{-5}$ |
| L1 Loss Weight $\varphi_{l1}$      | 1.0                |
| Ori. Loss Weight $\varphi_{ori}$   | 5.0                |
| Arr. Loss Weight $\varphi_{arr}$   | 1.0                |
| Feat. Loss Weight $\varphi_{feat}$ | 0.1                |

works [2, 6–8] that a larger model should be accompanied with larger data to produce better results.

**Image Backbones.** In Tab. IV, we show that our model performance is not sensitive to the choice of image backbones. This makes embodied depolyment very efficient. While our model with DiNOv2 backbone only has 1.7 fps inference speed on a RTX 3060 laptop, this can be boosted to 20 fps by switching to EfficientNetB0 backbone without sacrificing model performance.

Table III. VLM Results on Offline Data.

| Scenario | GPT-4o [4] |        |          | Ours    |        |          |
|----------|------------|--------|----------|---------|--------|----------|
|          | ↓AOE(5)    | ↓MAOE  | ↑Arrival | ↓AOE(5) | ↓MAOE  | ↑Arrival |
| Mean     | 72.22°     | 87.39° | 69.38%   | 7.97°   | 15.23° | 81.85%   |
| Turn     | 68.61°     | 88.02° | 68.66%   | 19.67°  | 26.63° | 68.91%   |
| Cros.    | 65.33°     | 81.12° | 66.52%   | 5.43°   | 14.07° | 75.03%   |
| Detour   | 76.86°     | 90.76° | 68.81%   | 8.71°   | 13.94° | 78.54%   |
| Prox.    | 75.65°     | 95.74° | 66.33%   | 5.54°   | 14.32° | 90.64%   |
| Crowd    | 75.85°     | 84.88° | 75.47%   | 4.77°   | 12.01° | 87.50%   |
| Other    | 71.03°     | 83.85° | 70.49%   | 3.67°   | 10.40° | 90.19%   |
| All      | 71.51°     | 85.03° | 70.04%   | 4.63°   | 11.53° | 87.84%   |

Table IV. **Comparison of backbones and architecture.** All models are *pretrained* with 2000 hours of video and fine-tuned with expert data. Both metrics are taking the category mean. \*Pretrained from ACO [9].

| Metric   | EfficientNetB0 | ResNet50      | DiNOv2 | ResNet34*     | ViNT**        |
|----------|----------------|---------------|--------|---------------|---------------|
| MAOE (↓) | 15.33°         | <u>15.16°</u> | 15.23° | <b>15.13°</b> | 15.26°        |
| L2 (↓)   | 1.11 m         | 1.15 m        | 1.12 m | <u>1.09 m</u> | <b>1.08 m</b> |

## C. More Qualitative Results

In Fig. III, we provide more qualitative resting results on the offline data. We divide the results into three categories. **Success**: predicted action aligns well with ground truth action. **Large error**: predicted action does not align with ground truth but may still lead to successful navigation. **Fail**: predicted action may lead to failed navigation. The most significant observation is that large errors in offline data do not necessarily lead to failure in navigation, due to the multi-modality characteristic of policy learning. For example, in the fifth row, although the ground truth action takes a detour to the right of the traffic drum, the predicted action that goes straight from the left of the drum should also lead to successful navigation.

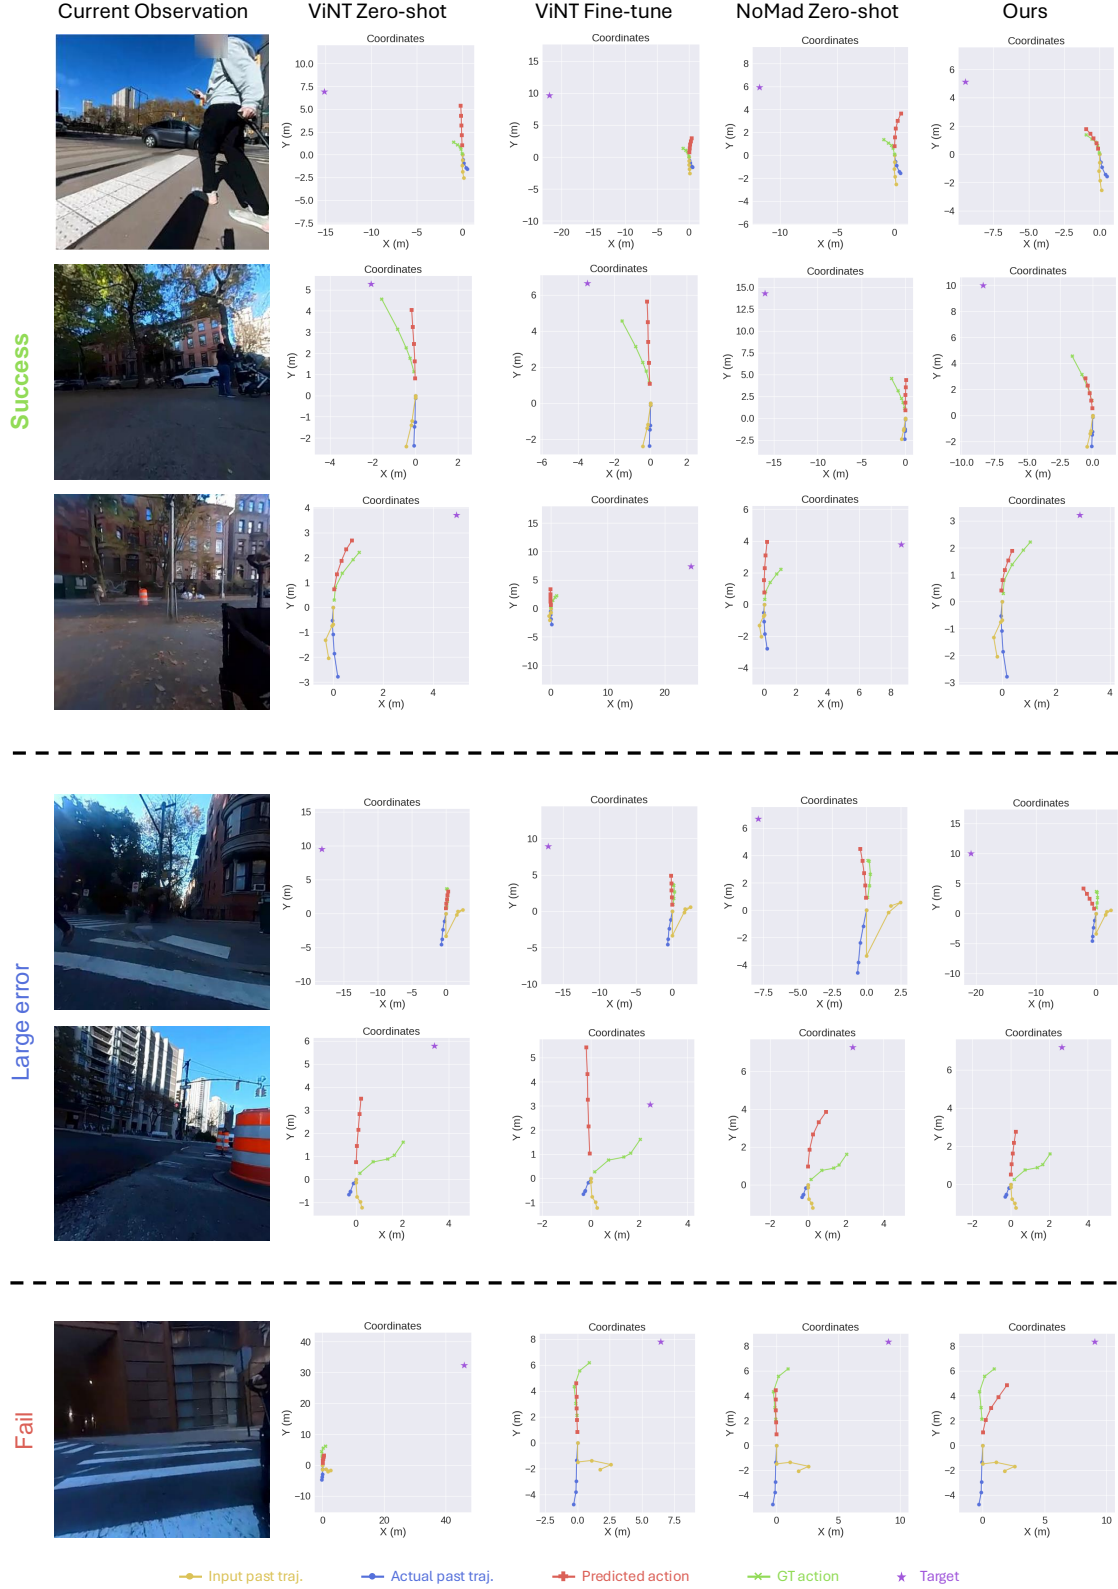

Figure III. **More Qualitative Results.** We provide more qualitative results in our offline testing. The results are categorized into success, large error, and fail. Success means the predicted action aligns with ground truth action. Large error means prediction action does not align with ground truth but still leads to successful navigation. Fail cases are those that may lead to failed navigation.

## References

- [1] Dhruv Shah, Ajay Sridhar, Nitish Dashora, Kyle Stachowicz, Kevin Black, Noriaki Hirose, and Sergey Levine. ViNT: A foundation model for visual navigation. In *CoRL*, 2023. [1](#)
- [2] Maxime Oquab, Timothée Darcet, Théo Moutakanni, Huy V. Vo, Marc Szafraniec, Vasil Khalidov, Pierre Fernandez, Daniel HAZIZA, Francisco Massa, Alaaeldin El-Nouby, Mido Assran, Nicolas Ballas, Wojciech Galuba, Russell Howes, Po-Yao Huang, Shang-Wen Li, Ishan Misra, Michael Rabbat, Vasu Sharma, Gabriel Synnaeve, Hu Xu, Herve Jegou, Julien Mairal, Patrick Labatut, Armand Joulin, and Piotr Bojanowski. DINOv2: Learning robust visual features without supervision. *Transactions on Machine Learning Research*, 2024. [1](#), [2](#)
- [3] Alexey Dosovitskiy. An image is worth 16x16 words: Transformers for image recognition at scale. *arXiv preprint arXiv:2010.11929*, 2020. [1](#)
- [4] Josh Achiam, Steven Adler, Sandhini Agarwal, Lama Ahmad, Ilge Akkaya, Florencia Leoni Aleman, Diogo Almeida, Janko Altschmidt, Sam Altman, Shyamal Anadkat, et al. Gpt-4 technical report. *arXiv preprint arXiv:2303.08774*, 2023. [1](#), [2](#)
- [5] Ilya Loshchilov and Frank Hutter. Decoupled weight decay regularization. In *International Conference on Learning Representations*, 2019. [2](#)
- [6] Tom B Brown. Language models are few-shot learners. *arXiv preprint arXiv:2005.14165*, 2020. [2](#)
- [7] Alexander Kirillov, Eric Mintun, Nikhila Ravi, Hanzi Mao, Chloe Rolland, Laura Gustafson, Tete Xiao, Spencer Whitehead, Alexander C Berg, Wan-Yen Lo, et al. Segment anything. In *ICCV*, pages 4015–4026, 2023.
- [8] Danny Driess, Fei Xia, Mehdi SM Sajjadi, Corey Lynch, Aakanksha Chowdhery, Brian Ichter, Ayzan Wahid, Jonathan Tompson, Quan Vuong, Tianhe Yu, et al. Palm-e: An embodied multimodal language model. *arXiv preprint arXiv:2303.03378*, 2023. [2](#)
- [9] Qihang Zhang, Zhenghao Peng, and Bolei Zhou. Learning to drive by watching youtube videos: Action-conditioned contrastive policy pretraining. In *ECCV*, pages 111–128. Springer, 2022. [2](#)
